# Supplementary material for: Geo-Spatial Characteristics of 567 Places of Tick-Borne Encephalitis Infection in Southern Germany, 2018–2020
Source: MDPI journal article supplement (doi:10.3390/microorganisms10030643), 2022-03-17
Supplement: s1 [file s1]

# Geo-Spatial Characteristics of 567 Places of Tick-Borne Encephalitis Infection in Southern Germany, 2018–2020

Amelie M. Friedsam, Oliver J. Brady, Antonia Pilic, Gerhard Dobler, Wiebke Hellenbrand and Teresa M. Nygren

## Supplementary Materials

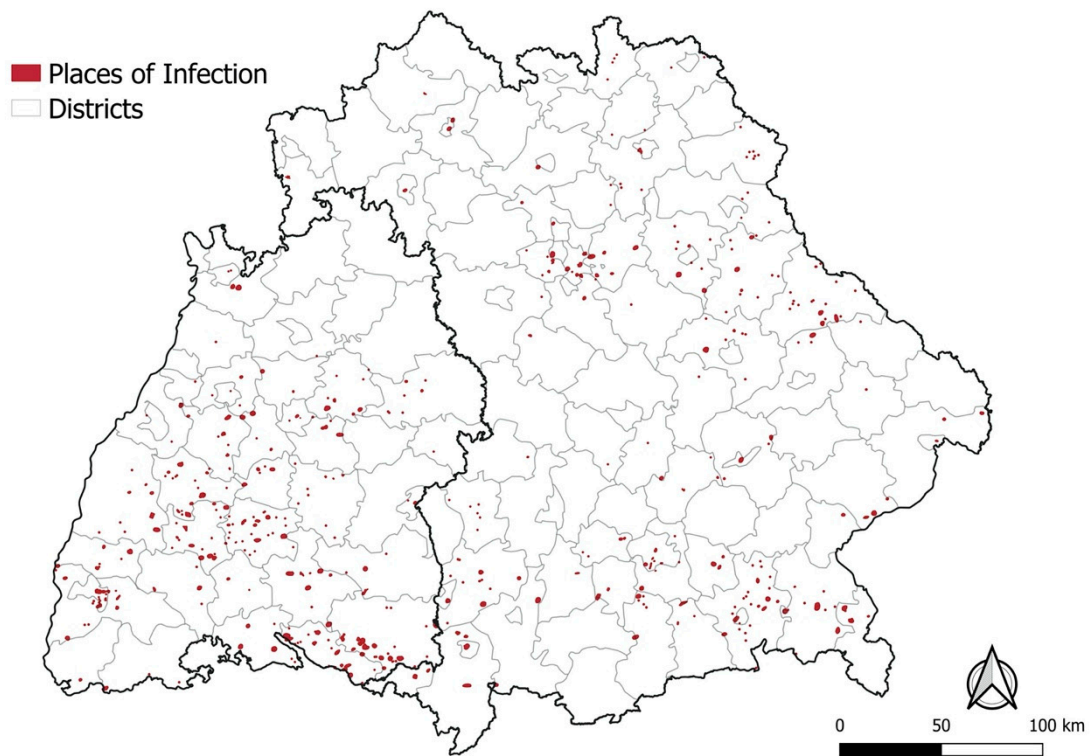

**Figure S1.** Self-reported places of infection ( $n = 567$ ) by 359 notified TBE cases in the study region Bavaria and Baden-Wuerttemberg, 2018–2020.

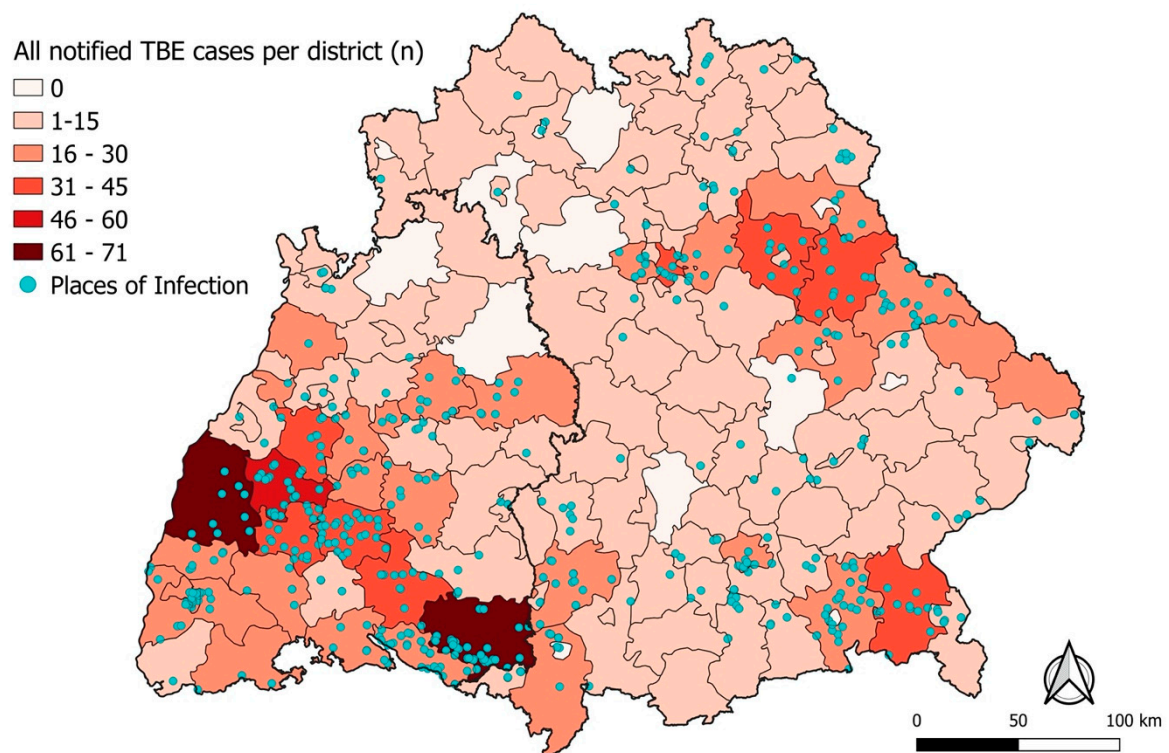

**Figure S2.** Spatial representativeness of the study data; Self-reported places of TBE infection compared with overall notified TBE cases per district; the choropleth map is colour-coded by the absolute count of all notified TBE cases per district between 2018 and 2020.

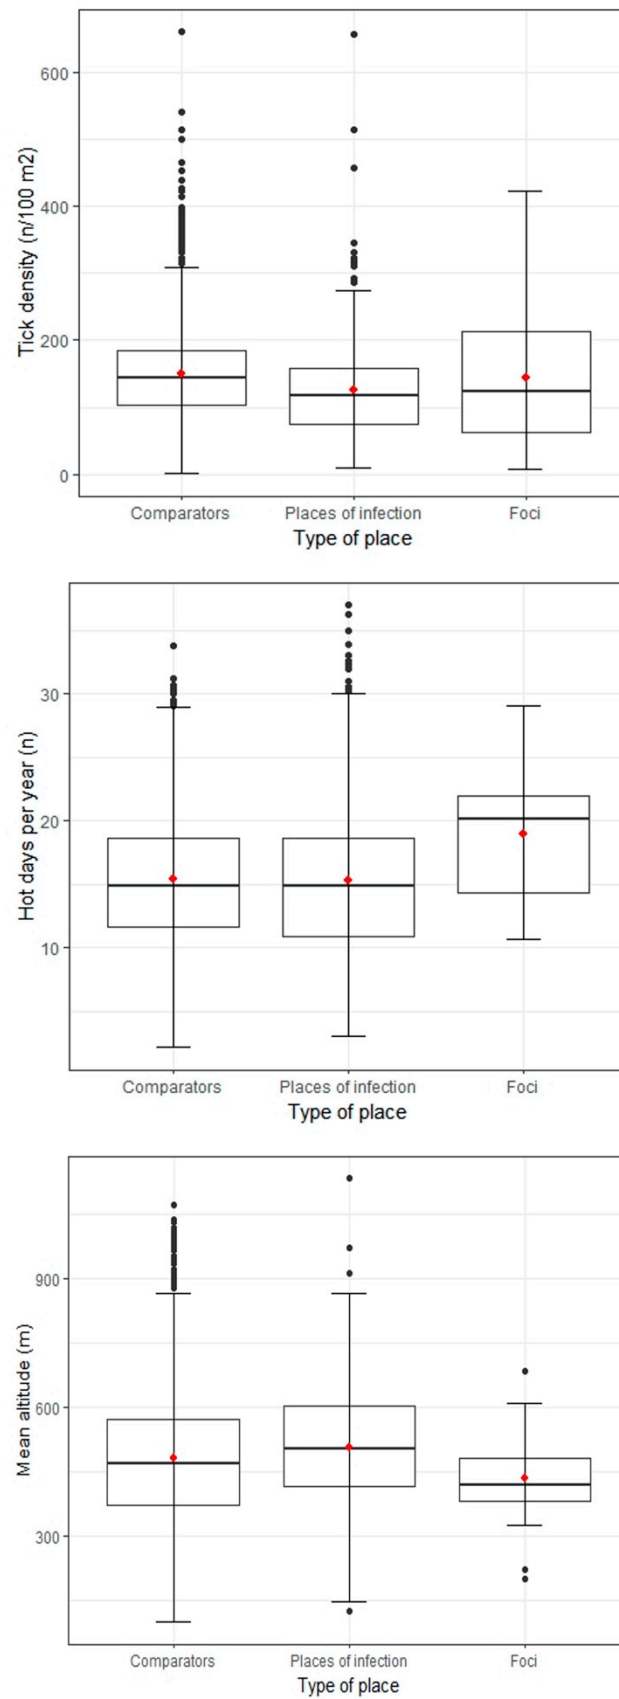

**Figure S3.** Distribution of tick density ( $n/100\text{ m}^2$ ), hot days ( $>30\text{ }^{\circ}\text{C}$ ) per year ( $n$ ), and altitude for comparator places ( $n = 1701$ ), places of TBE infection ( $n = 567$ ), and natural TBE foci ( $n = 41$ ).

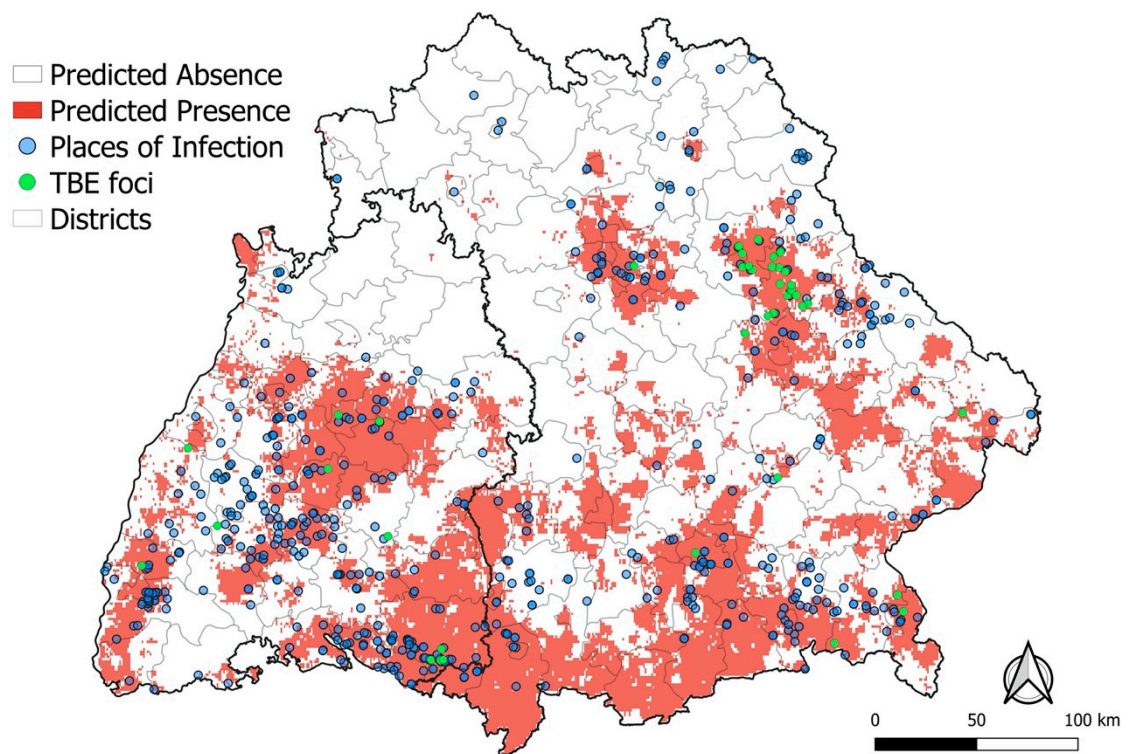

**Figure S4.** Binary map based on the optimised probability threshold maximising the sum of sensitivity and specificity of the ecological niche model predictions, superimposed with places of TBE infection and TBE foci; the cut-off probability threshold for place-of-TBE-infection presence is at 0.28 with sensitivity 69% and specificity 63%.

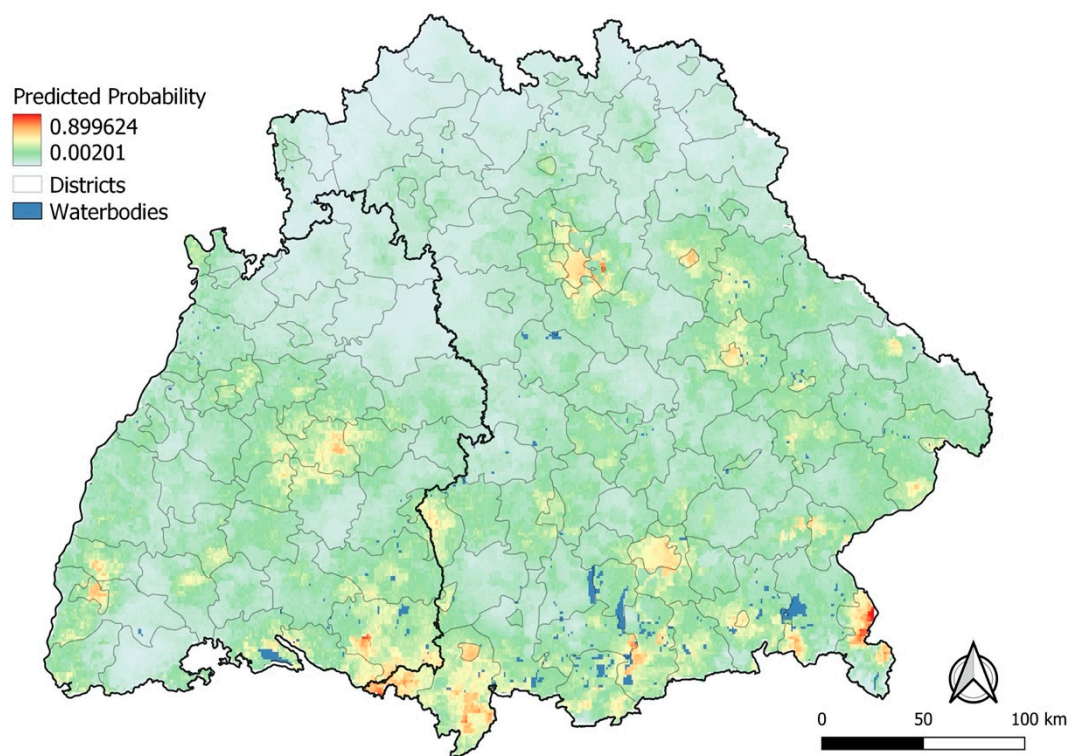

**Figure S5.** Predictive map from sensitivity analysis with presence data limited to only TBE foci and places of TBE infection where a tick bite occurred (59% of all places of TBE infection).



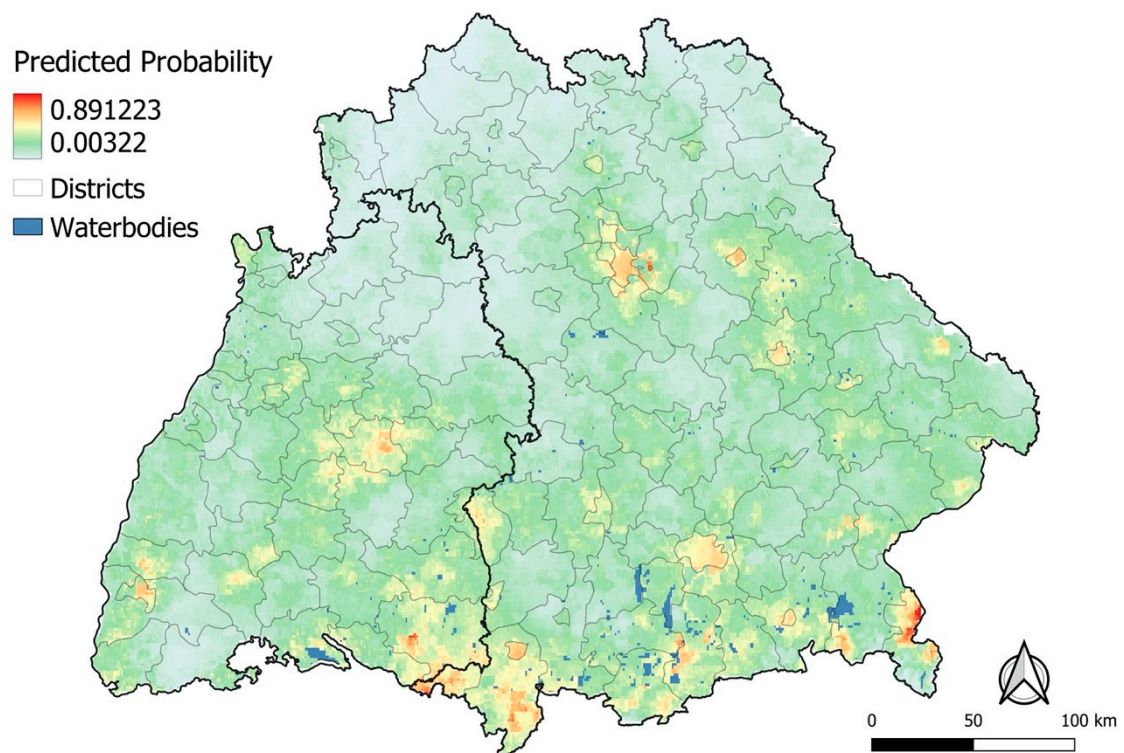

**Figure S6.** Predictive map from sensitivity analysis with presence data limited to only TBE foci and places of TBE infection smaller than 1 km<sup>2</sup> (66% of all places of TBE infection).

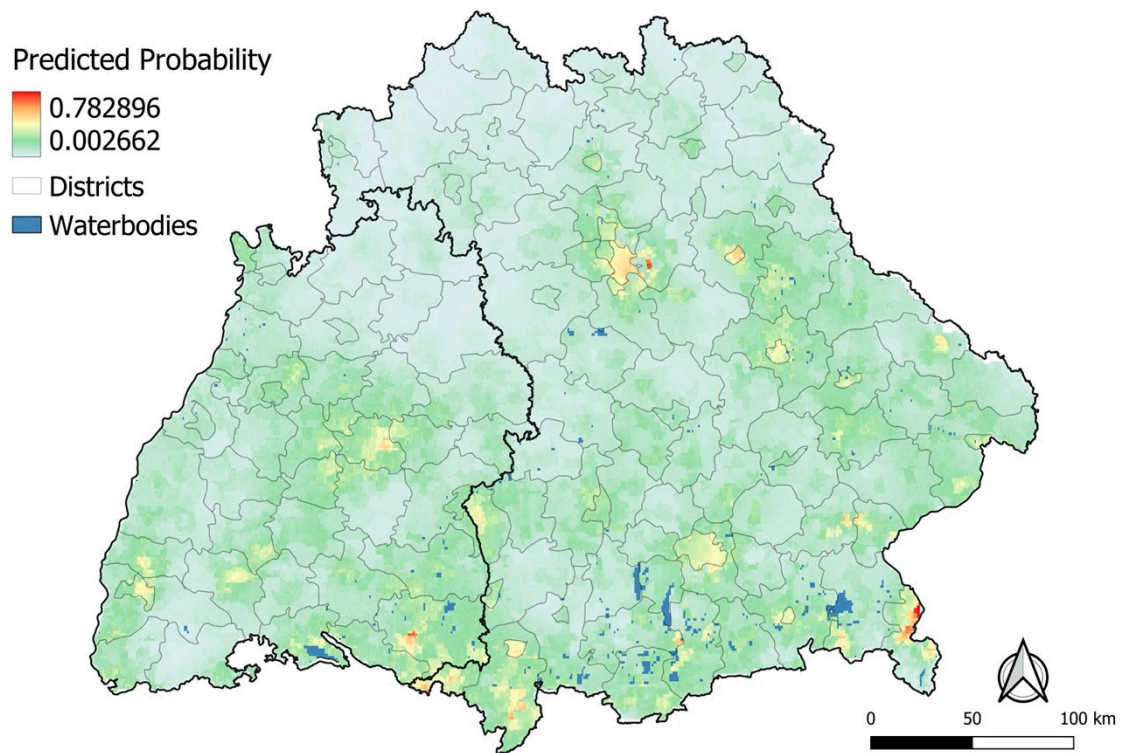

**Figure S7.** Predictive map from sensitivity analysis with presence data limited to only TBE foci and places of TBE infection that have been reported as standalone places by a case (weight = 1) (33% of all places of TBE infection).

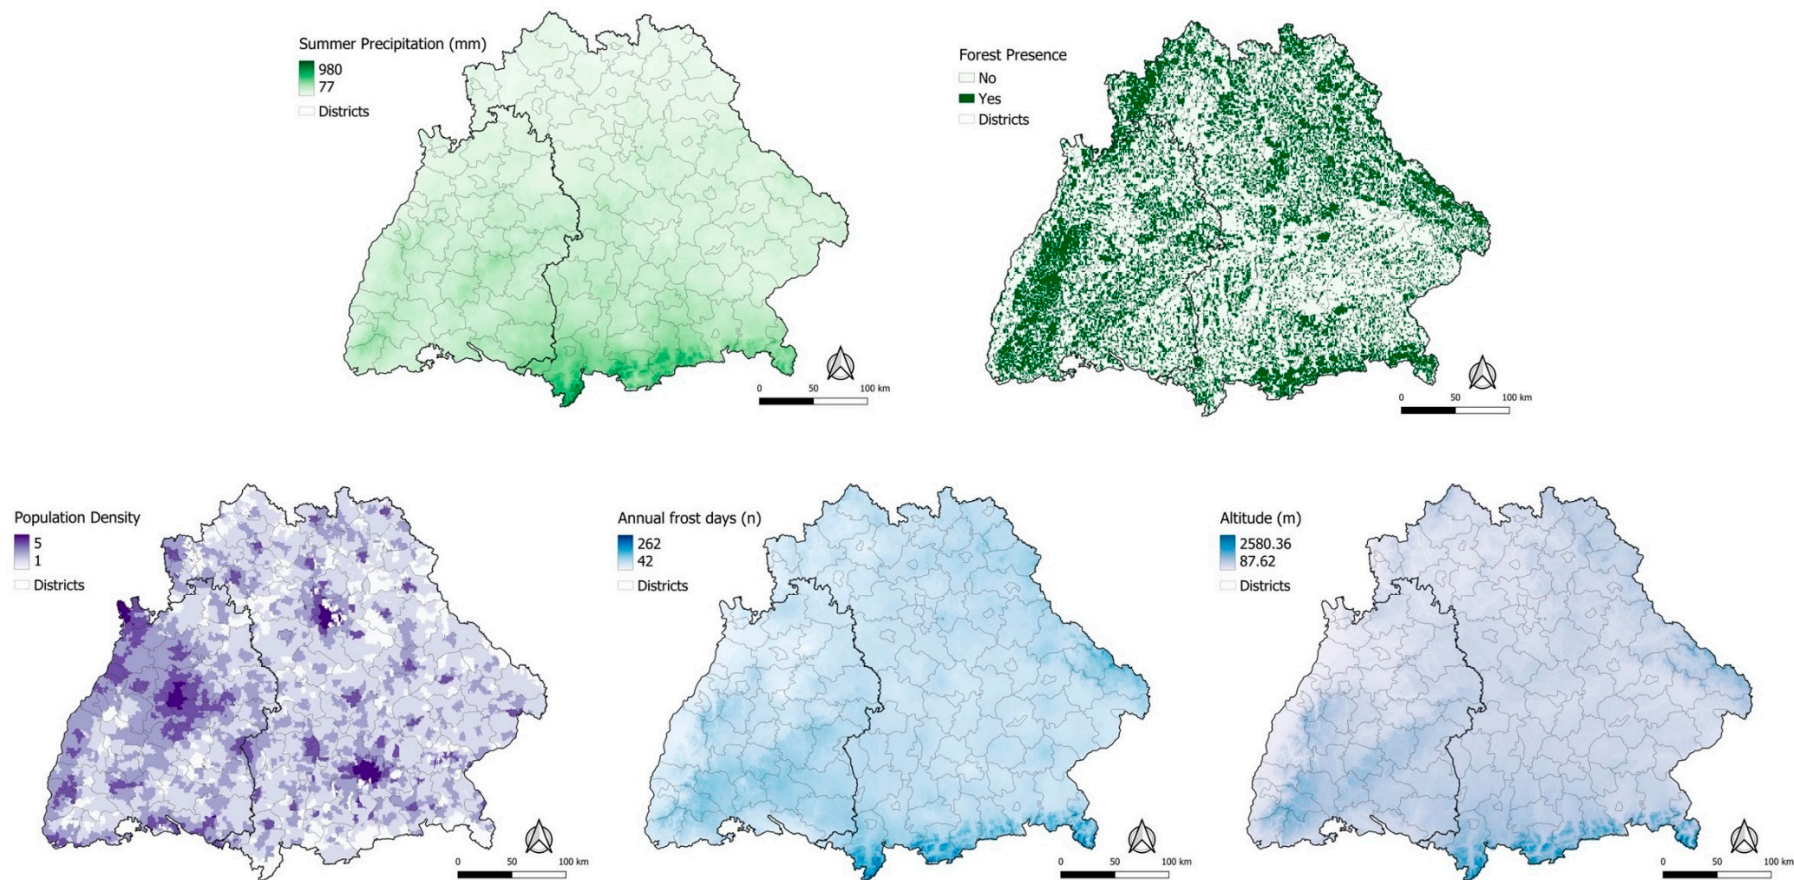

**Figure S8.** Raster files of summer precipitation (mm), forest presence (yes/no), population density (level 1–5), annual frost days (n), and altitude (m); Levels for population density are measured in inhabitants (n) per km<sup>2</sup>: 1 = 0–50/km<sup>2</sup>, 2 = 50–150/km<sup>2</sup>, 3 = 150–500/km<sup>2</sup>, 4 = 500–2000/km<sup>2</sup>, 5 = 2000–4790/km<sup>2</sup>.



**Table S1.** Descriptive statistics of ecological covariates at places of TBE infection, natural TBE foci, and comparator places after VIF selection.

|                                                            | Mean  | Standard<br>Deviation | Minimum | Maximum |
|------------------------------------------------------------|-------|-----------------------|---------|---------|
| <b>Mean summer temperature (°C)</b>                        |       |                       |         |         |
| Places of infection                                        | 18.7  | 1.1                   | 14.8    | 21.5    |
| TBE foci                                                   | 19.1  | 0.6                   | 17.7    | 20.3    |
| Comparator places                                          | 18.7  | 1.0                   | 13.5    | 21.5    |
| <b>Number of hot days (&gt; 30 °C) per year (n)</b>        |       |                       |         |         |
| Places of infection                                        | 15.3  | 6.4                   | 3.0     | 37.0    |
| TBE foci                                                   | 19.0  | 4.7                   | 10.7    | 29.0    |
| Comparator places                                          | 15.4  | 5.3                   | 2.1     | 33.7    |
| <b>Number of frost days (&lt; 0 °C) per year (n)</b>       |       |                       |         |         |
| Places of infection                                        | 90.7  | 14.1                  | 53.8    | 131.3   |
| TBE foci                                                   | 92.2  | 10.1                  | 63.9    | 108.3   |
| Comparator places                                          | 91.2  | 15.3                  | 48.0    | 164.8   |
| <b>Mean summer precipitation height (mm)*</b>              |       |                       |         |         |
| Places of infection                                        | 264.2 | 108.6                 | 77.0    | 761.4   |
| TBE foci                                                   | 247.4 | 80.6                  | 180.8   | 484.3   |
| Comparator places                                          | 236.9 | 85.7                  | 107.5   | 667.1   |
| <b>Number of snow cover days (&gt;= 1 cm) per year (n)</b> |       |                       |         |         |
| Places of infection                                        | 26.8  | 16.3                  | 0.0     | 94.5    |
| TBE foci                                                   | 21.3  | 10.2                  | 0.0     | 46.7    |
| Comparator places                                          | 27.3  | 18.0                  | 0.0     | 140.8   |
| <b>Tick density (n/100m<sup>2</sup>)</b>                   |       |                       |         |         |
| Places of infection                                        | 125.3 | 68.1                  | 10.4    | 656.0   |
| TBE foci                                                   | 143.7 | 96.2                  | 7.1     | 421.4   |
| Comparator places                                          | 149.4 | 72.2                  | 1.1     | 660.0   |

**Table S2.** Raw odds ratios (OR) and 95% confidence intervals (95% CI) for places of TBE infection presence for all model covariates.

| Covariate            | OR   | 95% CI       |
|----------------------|------|--------------|
| Population Density   | 1.76 | (1.55, 2.01) |
| Forest presence      | 1.21 | (0.98, 1.59) |
| Vaccination coverage | 1.05 | (1.03, 1.08) |
| Summer temperature   | 1.05 | (1.02, 1.08) |
| Frost days           | 1.04 | (1.03, 1.06) |
| Summer precipitation | 1.01 | (1.01, 1.01) |
| Tick density         | 1.00 | (1.00, 1.00) |
| Snow cover days      | 0.98 | (0.96, 0.99) |

\* These values should be interpreted with caution since the size of the units differed substantially between some covariates and may therefore impact comparability of the odds ratios.
